# Supplementary material for: The evolution of isolated cavities and hydraulic connection at the glacier bed – Part 2: A dynamic viscoelastic model
Source: Copernicus journal article supplement (doi:10.5194/tc-17-4817-2023), 2023-11-15
Supplement: Supplementary file 1 [file tc-17-4817-2023-supplement.zip]

Archive with 3 entries (3 files):
- supplementary_video_V2.mp4
- supplementary_video_V1.mp4
- tc-17-4817-2023-supplement-title-page.pdf
