# Supplementary material for: The evolution of isolated cavities and hydraulic connection at the glacier bed – Part 2: A dynamic viscoelastic model
Source: Copernicus journal article supplement (doi:10.5194/tc-17-4817-2023), 2023-11-15
Supplement: Supplementary file 1 [file tc-17-4817-2023-supplement.zip › tc-17-4817-2023-supplement-title-page.pdf]

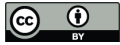

## *Supplement of*

# **The evolution of isolated cavities and hydraulic connection at the glacier bed – Part 2: A dynamic viscoelastic model**

**Christian Schoof**

*Correspondence to:* Christian Schoof ([cschoof@mail.ubc.ca](mailto:cschoof@mail.ubc.ca))

- [tc-17-4817-2023-supplement-title-page.pdf](#)
- [supplementary\\_video\\_V1.mp4](#)
- [supplementary\\_video\\_V2.mp4](#)

The copyright of individual parts of the supplement might differ from the article licence.
